# Supplementary material
Source: MDPI journal article supplement (https://www.mdpi.com/2073-4433/13/1/50)
Supplement: s1 [file s1]

# N<sub>2</sub>O Emissions from Two Austrian Agricultural Catchments Simulated with an N<sub>2</sub>O Submodule Developed for the SWAT Model

Cong Wang, Christoph Schürz, Ottavia Zoboli, Matthias Zessner, Karsten Schulz, Andrea Watzinger, Gernot Bodner and Bano Mehdi-Schulz

## 1. The Nitrification and Denitrification Processes in the SWAT Model

### The Nitrification Process

The SWAT model firstly simulates the total amount of nitrification and ammonia volatilization, and then partitions nitrification from volatilization [1]. Nitrification is a function of soil temperature and soil water content while ammonia volatilization is a function of soil temperature, depth and cation exchange capacity. The impact of environmental factors on nitrification and ammonia volatilization in a given layer is defined by the nitrification regulator and volatilization regulator.

The nitrification regulator is calculated:

$$\eta_{nit,ly} = \eta_{tmp,ly} * \eta_{sw,ly} \quad (S1)$$

and the volatilization regulator is calculated:

$$\eta_{vol,ly} = \eta_{tmp,ly} * \eta_{midz,ly} * \eta_{cec,ly} \quad (S2)$$

where  $\eta_{nit,ly}$  is the nitrification regulator,  $\eta_{vol,ly}$  is the volatilization regulator,  $\eta_{tmp,ly}$  is the nitrification/volatilization temperature factor,  $\eta_{sw,ly}$  is the nitrification soil water factor, and  $\eta_{midz,ly}$  is the volatilization depth factor.

The nitrification/volatilization temperature factor is calculated:

$$\eta_{tmp,ly} = 0.41 * \frac{(T_{soil,ly}-5)}{10} \quad \text{if } T_{soil,ly} > 5 \quad (S3)$$

Where  $T_{soil,ly}$  is the temperature of layer  $ly$  (°C). Nitrification/volatilization occurs only when the temperature of the soil layer exceeds 5 °C.

The nitrification soil water factor is calculated:

$$\eta_{sw,ly} = \frac{SW_{ly}-WP_{ly}}{0.25*(FC_{ly}-WP_{ly})} \quad \text{if } SW_{ly} < 0.25 * FC_{ly} - 0.75 * WP_{ly} \quad (S4)$$

$$\eta_{sw,ly} = 1.0 \quad \text{if } SW_{ly} \geq 0.25 * FC_{ly} - 0.75 * WP_{ly} \quad (S5)$$

Where  $\eta_{sw,ly}$  is the nitrification soil water factor,  $SW_{ly}$  is the soil water content of layer  $ly$  on a given day (mm H<sub>2</sub>O),  $WP_{ly}$  is the amount of water held in the soil layer at wilting point water content (mm H<sub>2</sub>O), and  $FC_{ly}$  is the amount of water held in the soil layer at field capacity water content (mm H<sub>2</sub>O).

The volatilization depth factor is calculated:

$$\eta_{midz,ly} = 1 - \frac{Z_{mid,ly}}{Z_{mid,ly} + \exp(4.706 - 0.0305 * Z_{mid,ly})} \quad (S6)$$

Where  $\eta_{midz,ly}$  is the volatilization depth factor, and  $Z_{mid,ly}$  is the depth from the soil surface to the middle of the layer (mm).

SWAT does not require the user to provide information about soil cation exchange capacity. The volatilization cation exchange factor is set to a constant value:

$$\eta_{cec,ly} = 0.15 \quad (S7)$$

The total amount of ammonium lost to nitrification and volatilization is calculated using a first-order kinetic rate equation:

$$N_{nit|vol,ly} = NH4_{ly} * (1 - \exp(-\eta_{nit,ly} - \eta_{vol,ly})) \quad (S8)$$

Where  $N_{nit|vol,ly}$  is the amount of ammonium converted via nitrification and volatilization in layer  $ly$  (kg N/ha),  $NH4_{ly}$  is the amount of ammonium in layer  $ly$  (kg N/ha),  $\eta_{nit,ly}$  is the nitrification regulator, and  $\eta_{vol,ly}$  is the volatilization regulator.

To partition  $N_{nit|vol,ly}$  between nitrification and volatilization, the expression is solved using each regulator individually to obtain a fraction of ammonium removed by each process:

$$fr_{nit,ly} = 1 - \exp(-\eta_{nit,ly}) \quad (S9)$$

$$fr_{vol,ly} = 1 - \exp(-\eta_{vol,ly}) \quad (S10)$$

Where  $fr_{nit,ly}$  is the estimated fraction of nitrogen lost by nitrification,  $fr_{vol,ly}$  is the estimated fraction of nitrogen lost by volatilization,  $\eta_{nit,ly}$  is the nitrification regulator, and  $\eta_{vol,ly}$  is the volatilization regulator.

The amount of nitrogen removed from the ammonium pool by nitrification is then calculated:

$$N_{nit,ly} = \frac{fr_{nit,ly}}{(fr_{nit,ly} + fr_{vol,ly})} * N_{nit|vol,ly} \quad (S11)$$

#### The denitrification process

The effect of nutrient cycling temperature factor on denitrification [1]:

$$\gamma_{tmp,ly} = \text{Max} \left[ \left( 0.9 * \frac{SoilTemp}{SoilTemp + e^{(9.93 - 0.312 * SoilTemp)}} + 0.1 \right), 0.1 \right] \quad (S12)$$

The effect of nutrient cycling temperature factor on denitrification works only when the temperature of the soil layer is above 0°C.  $SoilTemp$  is the temperature of layer  $ly$  (°C). The nutrient cycling temperature factor is never allowed to fall below 0.1.

The effect of nutrient cycling water factor on denitrification [1]:

$$\gamma_{sw,ly} = \frac{SW_{ly}}{FC_{ly}} \quad (S13)$$

Where  $SW_{ly}$  is soil water content (mm) and  $FC_{ly}$  is the amount of water held in the soil layer at field capacity water content (mm). The nutrient cycling water factor is never allowed to fall below 0.05.

## 2. The Existing SWAT N<sub>2</sub>O Submodule Developed

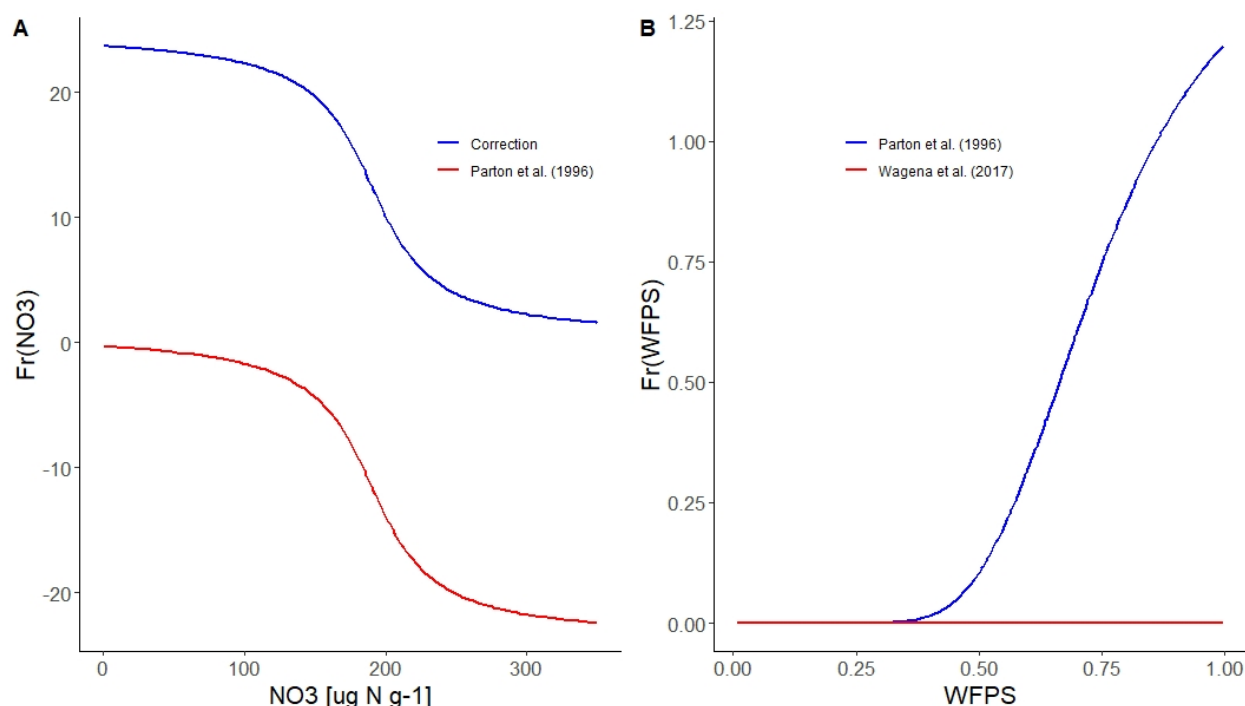

**Figure S1.** The representation of the equations for the impacts of soil NO<sub>3</sub><sup>-</sup> (A) and soil water (B) on the ratio of N<sub>2</sub>/N<sub>2</sub>O in Parton et al. [2] and Wagena et al. [3]. Fr(NO<sub>3</sub>) is the impact of soil NO<sub>3</sub><sup>-</sup> on the N<sub>2</sub>/N<sub>2</sub>O ratio, and Fr(WFPS) is the impact of soil moisture on the N<sub>2</sub>/N<sub>2</sub>O ratio.

## 3. The Fraction of Nitrified N Lost as N<sub>2</sub>O.

**Table S1.** Literature values of the fraction of nitrified N lost as N<sub>2</sub>O, which is denoted by K<sub>2</sub>.

| Reference             | K <sub>2</sub> (%) | Country    | Clay                                    | Silt  | Sand  |
|-----------------------|--------------------|------------|-----------------------------------------|-------|-------|
| Yoshida [4]           | 0-95               |            |                                         |       |       |
| Bremner [5]           | 3.5                |            | 25-27                                   | 36-47 | 28-37 |
| Freney et al. [6]     | 10                 | Australia  | Average value                           |       |       |
| Goreau et al. [7]     | 0.3-8              | England    |                                         |       |       |
| Lipschultz et al. [8] | 0.15-2.5           | USA        | Average value                           |       |       |
| Goodroad & Keeney [9] | 0.1-1.1            | USA        | 19                                      | 50    | 31    |
| Hynes & Knowles [10]  | 0.06-12.26         | Canada     |                                         |       |       |
| Martikainen [11]      | up to 20           | Finland    | forest soil                             |       |       |
| Tortoso [12]          | 0.02               | Sidney     |                                         |       |       |
| Remde [13]            | 0.1-3.9            | Germany    | Average value                           |       |       |
| Martikainen [14]      | up to 0.01         | Netherland | Sandy                                   |       |       |
| Maag & Vinther [15]   | 0.17-0.93          |            | coarse sandy soil/loamy sand/sandy loam |       |       |
| Kester et al. [16]    | 0.04-0.78          | Netherland |                                         |       |       |
| Jiang & Bakken [17]   | 0.07-5             | Norway     |                                         |       |       |
| Ingwersen et al. [18] | 0.01-0.055         | Germany    |                                         |       |       |
| Garrido et al. [19]   | <-0.001-1          | France     | 20-32.4                                 |       |       |
| Khalil et al. [20]    | 0.16-1.48          | France     | 20                                      | 73    | 7     |
| Cheng et al. [21]     | 0.01-0.22          | China      | Loam                                    |       |       |
| Bateman [22]          | 0.17-0.53          | UK         | 15                                      | 68    | 17    |

|                     |            |                |       |               |       |
|---------------------|------------|----------------|-------|---------------|-------|
| Mathieu et al. [23] | 0.13-2.32  | eastern France | 13.5  | 51.9          | 34.6  |
| Morkved et al. [24] | <0.1-27    | Norway         | 13    | 68            | 19    |
| Morkved et al. [25] | 0.02-7.6   | Norway         | 21    | 40            | 39    |
| Carter [26]         | 0.02-0.29  | Denmark        |       | Loamy sand    |       |
| Chen et al. [27]    | 0.03-0.12  | Australia      |       | Clay loam     |       |
| Gabally et al. [28] | 0.01-0.05  | Australia      | 14    | 23            | 53    |
| Frame et al. [29]   | 0.4-2.2    | USA            |       | Average value |       |
| Zhu et al. [30]     | 0.09-8.3   | USA            | 13-44 | 15-49         | 22-42 |
| Paul et al. [31]    | 0.025-0.85 |                |       | Silt loam     |       |

#### 4. Crop Grouping in SWAT

**Table S2.** Crop classification into groups for the setup of the Melk catchment (M1).

| SWAT code   | Crops                          | SWAT code   | Crops                           |
|-------------|--------------------------------|-------------|---------------------------------|
| <b>WWHT</b> | Silage rye                     | <b>BARL</b> | Summer barley                   |
|             | Silage rye/ corn               |             | Summer wheat                    |
|             | Winter rye                     |             | Summer spelt                    |
|             | Winter barley                  |             | Caraway                         |
|             | Winter durum                   |             | Summer oats                     |
|             | Winter beets                   |             | Oat and mixed grains            |
|             | Winter triticale               |             | Poppy                           |
|             | Winter wheat                   |             | Rape seed                       |
|             | Einkorn/ Emmer                 |             | Triticale                       |
|             | Winter spelt                   |             | Flax                            |
|             | Winter rye and meslin          |             | Buckwheat                       |
|             | Winter caraway                 |             | Camellia                        |
|             | Winter rapeseed                |             | Quinoa                          |
|             | Winter oats                    | <b>PAST</b> | Permanent pasture               |
|             |                                |             | Bioenergy grasses               |
| <b>CORN</b> | Corn / Beans in separated rows |             | 20 years fallow                 |
|             | Corn CORN-COB-MIX (CCM)        |             | Alpine pasture                  |
|             | Grain corn                     |             | Mountain pasture                |
|             | Millet                         |             | Blue lupine                     |
|             | Sorghum                        |             | Pasture (once mowed)            |
|             | Sunflowers                     |             | Forage grasses                  |
|             | Sweet corn                     |             | Fallow pastureland              |
|             |                                |             | Herding pasture                 |
| <b>SOYB</b> | Soybeans                       |             | Pasture with two uses           |
|             | Broad beans- grain mix         |             | Pasture with three or more uses |
|             | Broad bean                     |             | Turf grass                      |
|             | Peas – grain mix               |             | Other forage crops              |
|             | Peas                           |             | Other pasture areas             |
|             | Common vetch                   |             | Pasture for bedding             |
|             | Hairy vetch                    |             |                                 |
|             | Lupine                         |             |                                 |
|             | Vetch – grain mix              |             |                                 |
|             | Peavines                       |             |                                 |

**Table S3.** Crop classification into groups for the setup of the Melk catchment (M2).

| SWAT code   | Crops                            | SWAT code   | Crops                   |
|-------------|----------------------------------|-------------|-------------------------|
| <b>FESI</b> | Pasture with three and more uses | <b>CORN</b> | Grain corn              |
|             | Pasture with two uses            |             | Corn CORN-COB-MIX (CCM) |
|             | Other forage crops               |             | Sorghum                 |
|             | Forage grasses                   | <b>SOYB</b> | Soybeans                |
|             |                                  |             | Broad bean              |
| <b>WWHT</b> | Winter wheat                     |             | Peas                    |
|             | Winter barley                    |             | Broad beans – grain mix |
|             | Winter triticale                 |             | Flax                    |
|             | Winter rapeseed                  |             | Hemp                    |
|             | Sugar beet                       | <b>FESE</b> | Permanent pasture       |
|             | Oil pumpkin                      |             | Pasture (once mowed)    |
|             | Nuts (walnuts, hazelnuts, ...)   |             | Herding pasture         |
|             | Winter spelt                     |             |                         |
|             | Winter rye                       |             |                         |

The crops with small area not included in Table S6 were directly grouped into their neighbor main crops when we prepared the land use map.

**Table S4.** Crop classification into groups for the Zaya catchment.

| SWAT code   | Crops                 | SWAT code   | Crops                     |
|-------------|-----------------------|-------------|---------------------------|
| <b>WWHT</b> | Winter wheat          | <b>BARL</b> | Summer barley             |
|             | Winter rapeseed       |             | Summer wheat              |
|             | Winter barley         |             | Summer wheat              |
|             | Winter durum wheat    |             | Summer oats               |
|             | Winter triticale      |             | Buckwheat                 |
|             | Winter spelt          |             | Silage rye                |
|             | Winter rye            |             | Summer einkorn/ emmer     |
|             | Winter vetch          |             | Poppy                     |
|             | Einkorn/ Emmer        |             | Triticale                 |
|             | Winter poppy          |             | Summer rye                |
| <b>SGBT</b> | Sugar beet            | <b>CORN</b> | Grain corn                |
|             | Oil pumpkin           |             | Silage                    |
|             | Edible potatoes       |             | Millet                    |
|             | Starch potatoes       |             | Sorghum                   |
|             | Seed potatoes         |             | Seed corn for propagation |
|             | Food potatoes         | <b>FESC</b> | Fallow                    |
|             | Pumpkin               |             | Pasture (once mowed)      |
| <b>FESI</b> | Other forage crops    |             | Herding pasture           |
|             | Pasture with two uses |             | Common vetch              |
|             | Permanent pasture     |             |                           |
|             | Forage grass          |             |                           |

The crops with small area not included in Table S7 were directly grouped into their neighbor main crops when we prepared the land use map.

### 5. Parameters Calibrated Based on the Sensitivity Analysis in SWAT

**Table S5.** The calibrated parameters with their initial ranges, and final validated values for the Melk and Zaya catchments.

| Parameters    | Definition                                                                               | Initial range (M1) | Initial range (M2/Zaya) | Validated value (M1) | Validated value (M2) | Validated value (Zaya) |
|---------------|------------------------------------------------------------------------------------------|--------------------|-------------------------|----------------------|----------------------|------------------------|
| v__AL-PHA_BF  | Baseflow recession constant                                                              | (0, 1)             | (0, 1)                  | 0.05                 | 0.110                | 0.49                   |
| v__AL-PHA_BNK | Bank flow recession constant or constant of proportionality                              | (0, 1)             |                         |                      |                      |                        |
| v__BIOMIX     | Biological mixing efficiency                                                             |                    | (0, 1)                  |                      | 0.749                | 0.087                  |
| r__CANMX      | Maximum canopy storage                                                                   | (-0.9, 3)          |                         |                      |                      |                        |
| v__CDN        | Rate coefficient for denitrification                                                     | (0, 1.5)           | (0, 3)                  | 1.295                | 0.0005               | 0.01                   |
| r__CH_K1      | Effective hydraulic conductivity                                                         | (-0.4, 0.4)        |                         |                      |                      |                        |
| r__CH_K2      | Effective hydraulic conductivity of channel                                              | (-0.4, 0.4)        |                         |                      |                      |                        |
| v__CMN        | Rate coefficient for mineralization of the humus active organic nutrients                |                    | (0.0001, 0.003)         |                      | 0.0027               | 0.0022                 |
| r__CN2        | Curve number II                                                                          | (-0.2, 0.1)        |                         | -0.199               |                      |                        |
| r__CNOP_HVST  | SCS moisture condition II curve number for pervious areas specified in harvest/kill      |                    | (-0.25, 0.1)            |                      | -0.1                 | -0.101                 |
| r__CNOP_PLNT  | SCS moisture condition II curve number for pervious areas specified in plant operation   |                    | (-0.25, 0.1)            |                      | -0.1                 | -0.067                 |
| r__CNOP_TILL  | SCS moisture condition II curve number for pervious areas specified in tillage operation |                    | (-0.25, 0.1)            |                      | -0.155               | -0.197                 |
| v__EPCO       | Plant uptake compensation factor                                                         | (0, 0.9)           | (0, 1)                  |                      | 0.578                | 0.407                  |
| v__ERORGN     | Organic nitrogen enrichment ratio                                                        |                    | (0, 100)                |                      | 1.383                | 14.337                 |
| v__ESCO       | Soil evaporation compensation coefficient                                                | (0, 0.9)           | (0, 1)                  |                      | 0.758                | 0.41                   |
| v__GW_DELAY   | Delay time for aquifer recharge                                                          | (0, 500)           | (0, 250)                |                      | 35.239               | 42.95                  |
| v__GW_REVAP   | Revap coefficient                                                                        |                    | (0.02, 2)               |                      | 0.293                | 0.56                   |
| v__GWQMN      | Threshold water level in shallow aquifer for base flow                                   | (0, 5000)          | (0, 5000)               | 3494.76              | 117.093              | 245.61                 |

|               |                                                                                                |               |             |         |        |       |
|---------------|------------------------------------------------------------------------------------------------|---------------|-------------|---------|--------|-------|
| v__HLIFE_NGW  | Half-life of nitrate in the shallow aquifer                                                    | (0, 200)      |             | 197.869 | 54.601 |       |
| r__HRU_SL_P   | Average slope steepness                                                                        | (-0.25, 0.25) |             | -0.142  | -0.184 |       |
| v__LAT_TTI_ME | Lateral flow travel time                                                                       | (0, 180)      |             |         |        |       |
| v__N_UP-DIS   | Nitrogen uptake distribution parameter                                                         | (0, 100)      | (1, 31)     | 20.957  | 8.876  |       |
| v__NPERC_O    | Nitrate percolation coefficient                                                                | (0.125, 1)    | (0, 1)      | 0.959   | 0.791  | 0.938 |
| a__OV_N       | Manning's value for overland flow                                                              | (-0.09, 0.6)  | (0.01, 0.6) | 0.332   | 0.192  | 0.349 |
| v__RCHRG_DP   | Aquifer percolation coefficient                                                                | (0, 1)        | (0, 1)      |         | 0.187  | 0.433 |
| v__RCN        | Concentration of nitrogen in the rain                                                          | (0, 10)       |             | 2.188   |        |       |
| v__REVAP_MN   | Threshold water level in shallow aquifer for revap                                             | (0, 500)      | (0, 500)    | 105.999 | 103.12 |       |
| v__RSDCO      | Rate coefficient for mineralization of the residue fresh organic nutrients                     |               | (0, 1)      | 0.3696  | 0.111  |       |
| v__SDNCO      | Threshold value of nutrient cycling water factor for denitrification to occur                  | (0, 0.5)      | (0, 1)      | 0.5801  | 0.983  |       |
| v__SFTMP      | Mean air temperature at which precipitation is equally likely to be rain as snow/freezing rain |               | (-2, 2)     | 0.4     | 0.21   |       |
| v__SHALLS_T_N | Amount of nitrate in the shallow aquifer                                                       | (0, 1000)     |             |         |        |       |
| v__SLSOIL     | Hillslope length                                                                               | (0, 150)      |             |         |        |       |
| v__SLSUBBS_N  | Slope length                                                                                   | (0, 150)      | (-0.5, 0.5) | 1.084   | -0.104 | 0.283 |
| v__SMFMN      | Melt factor on December 21                                                                     | (0, 10)       | (1.4, 4)    | 3.5     | 3.07   |       |
| v__SMFMX      | Melt factor on June 21                                                                         | (0, 10)       | (3, 6.9)    | 5       | 3.5    |       |
| v__SMTMP      | Threshold temperature for snowmelt                                                             | (-2,2)        | (-2, 2)     | 0.1     | 0.67   |       |
| v__SNO50C_OV  | Fraction of SNOCOVMX that provide 50% cover                                                    | (0.1, 0.9)    | (0, 1)      | 0.336   | 0.178  | 0.31  |
| v__SNOCO_VMX  | Threshold depth of snow, above which there is 100% cover                                       | (0, 500)      | (0, 500)    | 160.33  | 271.72 |       |
| r__SOL_AWC()  | Available water capacity                                                                       | (-0.9, 1.5)   | (-0.5, 0.5) | 0.073   | 0.095  |       |
| r__SOL_BD     | Moist bulk density                                                                             |               | (-0.5, 0.5) | 0.170   | 0.159  |       |
| r__SOL_K()    | Saturated hydraulic conductivity                                                               | (-1, 1)       | (-0.5, 2)   | 0.415   | 0.124  |       |
| v__SURLAG     | Surface runoff lag coefficient                                                                 | (0, 1)        | (0.05, 12)  | 0.267   | 0.05   |       |
| v__TIMP       | Snow temperature lag factor                                                                    | (0, 1)        | (0.01, 1)   | 0.3     | 0.29   |       |

v: the original parameter value in the SWAT model is to be replaced by validated value;  
 a: the validated value will be added to the original parameter value; r: the original parameter value will be multiplied by  $(1 + \text{validated value})$ .

## 6. Discharge and Nitrate Simulations in SWAT

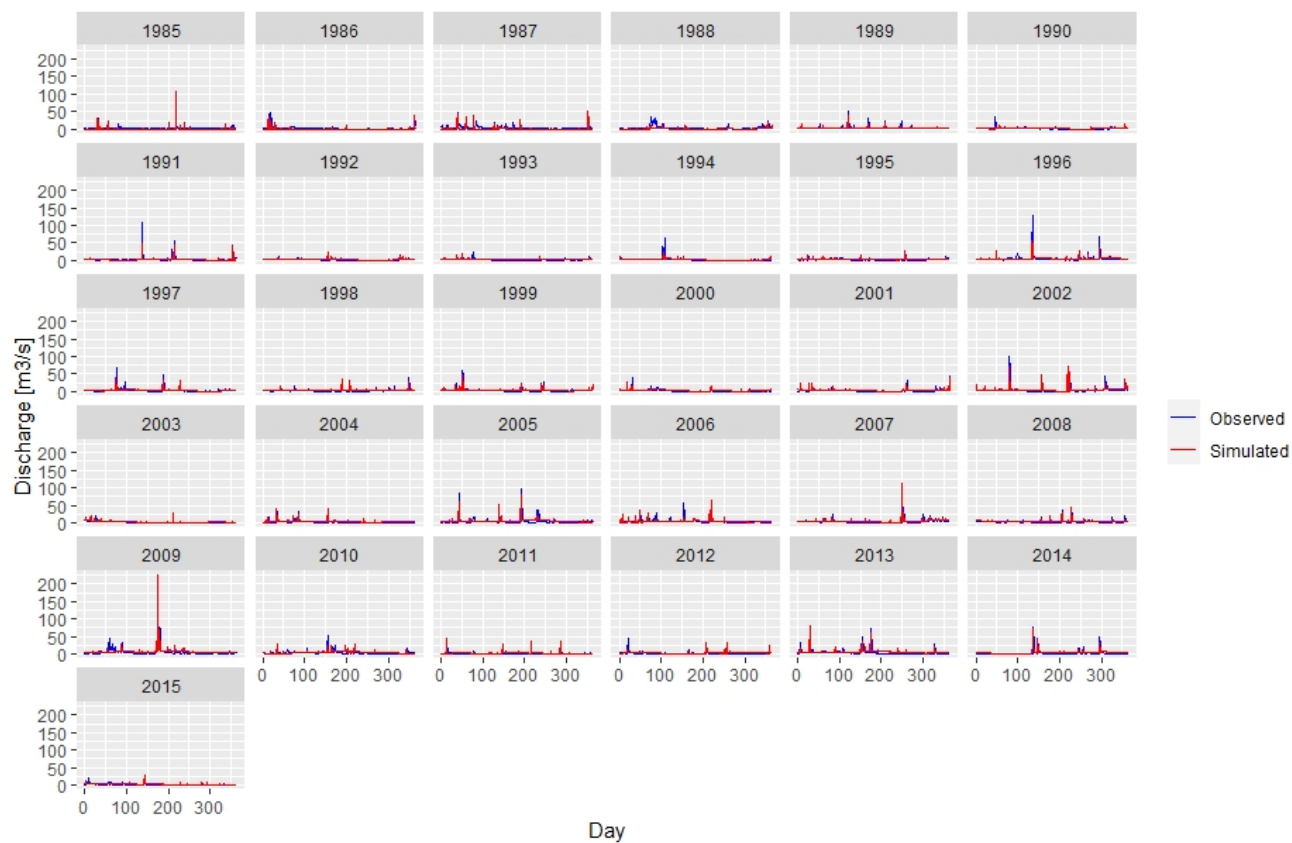

**Figure S2.** Discharge hydrograph for the setup of the Melk catchment (M1).



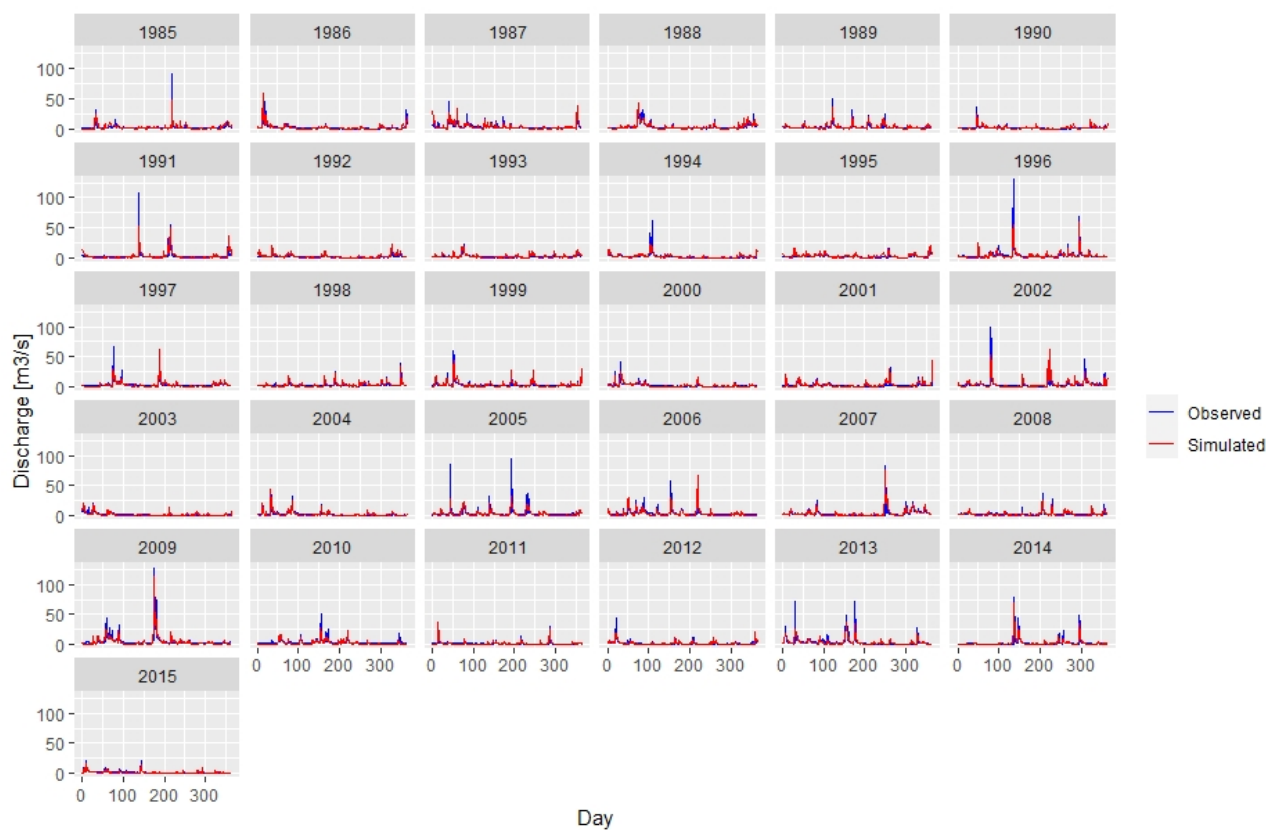

Figure S3. Discharge hydrograph for the setup of the Melk catchment (M2).

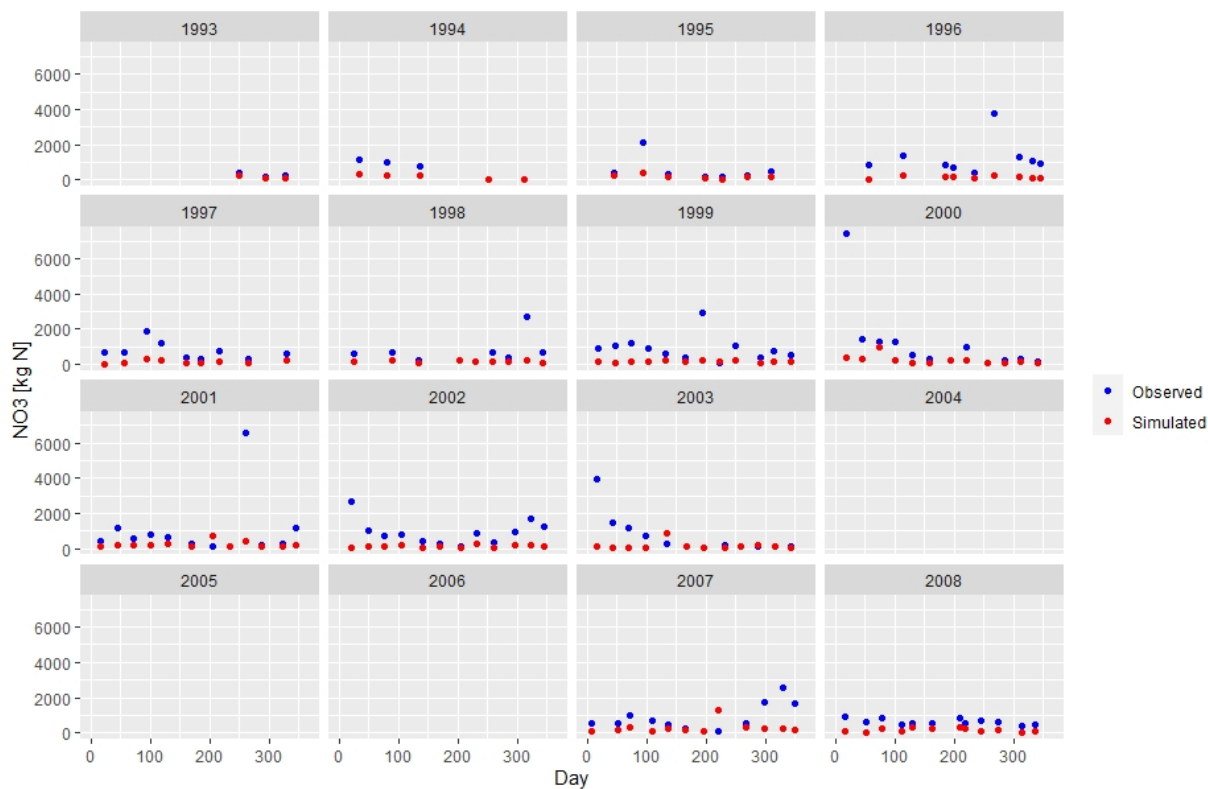

Figure S4. Simulated NO<sub>3</sub> for the setup of the Melk catchment (M1).

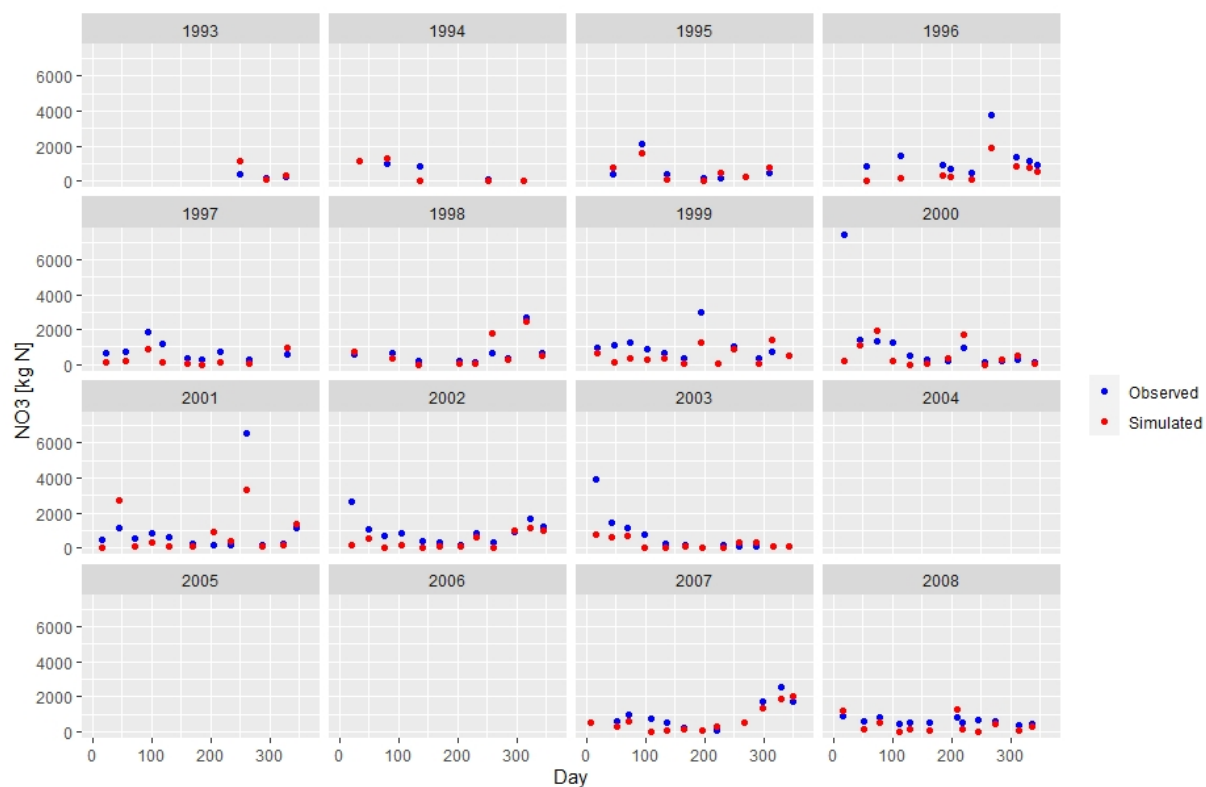

Figure S5. Simulated  $\text{NO}_3$  for the setup of the Melk catchment (M2).

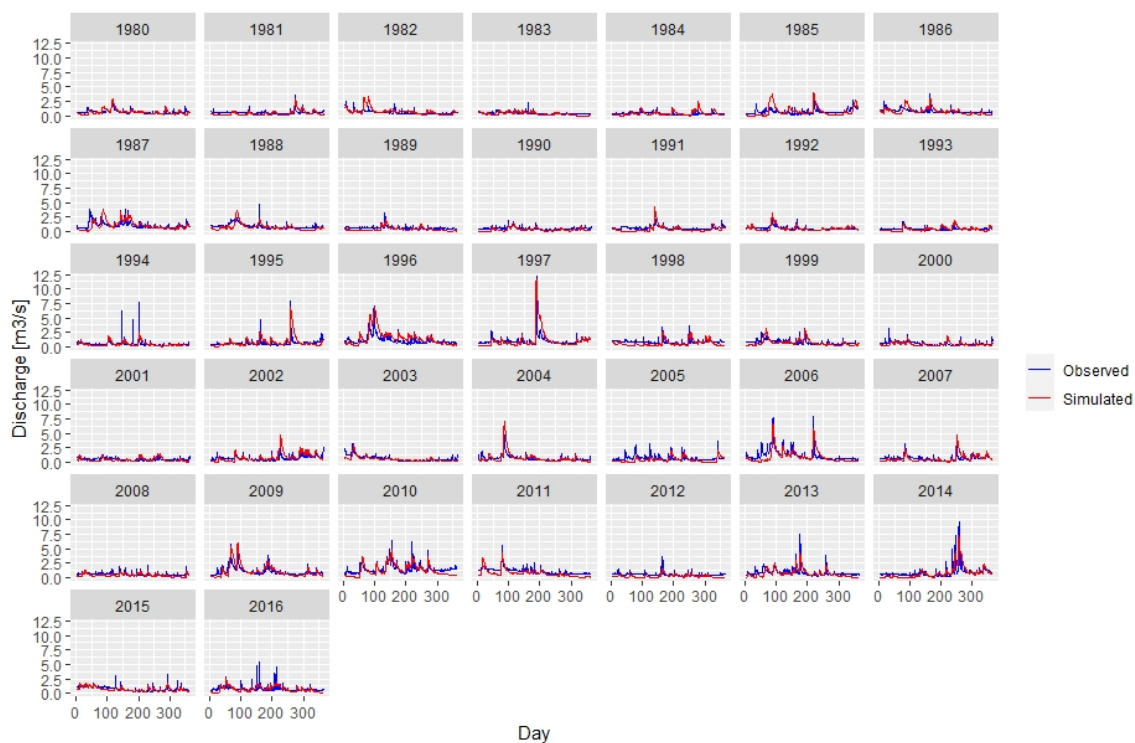

Figure S6. Discharge hydrograph for the setup of the Zaya catchment.

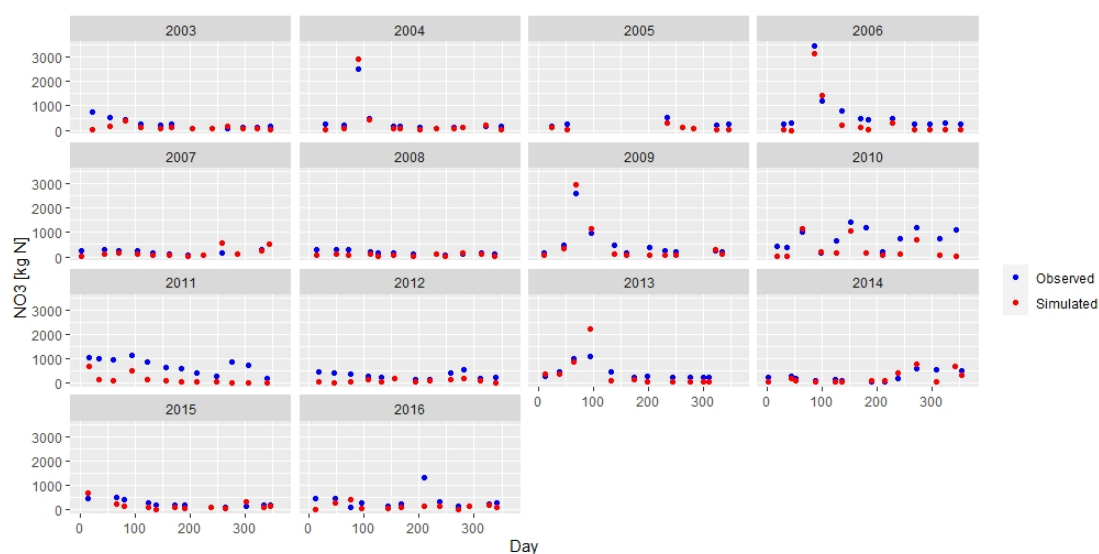

Figure S7. Simulated NO<sub>3</sub> for the setup of the Zaya catchment.

## 7. Annual Water Balance Calculations

Table S6. SWAT simulated water balance for the M1 setup in the Melk catchment.

| Year | PREC (mm) | ET (mm) | SW (mm) | PERC (mm) | SURQ (mm) | GWQ (mm) | WYIELD (mm) | LATQ (mm) | ΔSW (mm) | Balance (mm) | Percentage error (%) |
|------|-----------|---------|---------|-----------|-----------|----------|-------------|-----------|----------|--------------|----------------------|
| 1985 | 882       | 435     | 269     | 306       | 91        | 0        | 144         | 42        | 4        | -8           | -0.9                 |
| 1986 | 710       | 404     | 287     | 191       | 71        | 0        | 114         | 31        | -14      | 16           | 2.2                  |
| 1987 | 953       | 407     | 265     | 407       | 106       | 0        | 180         | 56        | 8        | -49          | -5.1                 |
| 1988 | 921       | 404     | 272     | 408       | 33        | 38       | 146         | 56        | 1        | 0            | -0.1                 |
| 1989 | 880       | 417     | 266     | 375       | 50        | 179      | 308         | 58        | 7        | -47          | -5.4                 |
| 1990 | 693       | 360     | 279     | 258       | 21        | 135      | 209         | 40        | -6       | 7            | 1.0                  |
| 1991 | 766       | 397     | 274     | 259       | 76        | 168      | 294         | 38        | -1       | -15          | -1.9                 |
| 1992 | 754       | 381     | 266     | 308       | 28        | 191      | 279         | 47        | 7        | -31          | -4.1                 |
| 1993 | 772       | 399     | 272     | 291       | 31        | 235      | 323         | 42        | 1        | -8           | -1.0                 |
| 1994 | 686       | 361     | 266     | 266       | 22        | 213      | 292         | 41        | 7        | -27          | -4.0                 |
| 1995 | 826       | 381     | 267     | 355       | 36        | 283      | 385         | 51        | 6        | -18          | -2.2                 |
| 1996 | 979       | 405     | 266     | 426       | 91        | 380      | 554         | 63        | 7        | -33          | -3.4                 |
| 1997 | 852       | 423     | 265     | 339       | 44        | 276      | 388         | 50        | 8        | -29          | -3.4                 |
| 1998 | 851       | 425     | 290     | 308       | 45        | 304      | 414         | 49        | -17      | 26           | 3.0                  |
| 1999 | 864       | 416     | 280     | 333       | 77        | 282      | 423         | 47        | -7       | -18          | -2.1                 |
| 2000 | 748       | 392     | 281     | 263       | 37        | 252      | 345         | 42        | -8       | 8            | 1.0                  |
| 2001 | 831       | 398     | 293     | 314       | 66        | 266      | 393         | 46        | -20      | 11           | 1.4                  |
| 2002 | 1026      | 407     | 286     | 435       | 138       | 366      | 582         | 61        | -13      | -20          | -2.0                 |
| 2003 | 623       | 383     | 275     | 188       | 30        | 216      | 293         | 31        | -1       | -22          | -3.6                 |
| 2004 | 753       | 350     | 267     | 307       | 66        | 275      | 398         | 44        | 7        | -34          | -4.5                 |
| 2005 | 963       | 379     | 273     | 399       | 119       | 367      | 560         | 56        | 0        | -9           | -1.0                 |
| 2006 | 877       | 350     | 269     | 378       | 102       | 350      | 524         | 53        | 4        | -29          | -3.3                 |
| 2007 | 1030      | 403     | 276     | 459       | 95        | 350      | 526         | 63        | -2       | -7           | -0.6                 |
| 2008 | 875       | 400     | 264     | 382       | 51        | 395      | 524         | 56        | 9        | -45          | -5.1                 |

|      |      |     |     |     |     |     |     |    |     |     |      |
|------|------|-----|-----|-----|-----|-----|-----|----|-----|-----|------|
| 2009 | 1105 | 384 | 274 | 487 | 156 | 475 | 726 | 69 | -1  | -16 | -1.4 |
| 2010 | 880  | 375 | 293 | 365 | 68  | 345 | 487 | 53 | -20 | 18  | 2.1  |
| 2011 | 697  | 393 | 270 | 237 | 54  | 195 | 297 | 36 | 4   | -39 | -5.6 |
| 2012 | 740  | 385 | 268 | 277 | 39  | 232 | 323 | 40 | 6   | -19 | -2.5 |
| 2013 | 1034 | 366 | 265 | 494 | 108 | 459 | 659 | 70 | 8   | -35 | -3.4 |
| 2014 | 848  | 356 | 267 | 362 | 70  | 338 | 479 | 53 | 7   | -18 | -2.1 |
| 2015 | 661  | 374 | 263 | 237 | 22  | 217 | 291 | 38 | 10  | -34 | -5.2 |

Abbreviations: PREC: precipitation; ET: evapotranspiration; SW: soil water content; PERC: water entering the vadose zone from the soil profile; SURQ: surface runoff; GWQ: groundwater contribution to streamflow; WYIELD: water yield; LATQ: lateral flow;  $\Delta$ SW: the change of soil water content.

**Table S7.** SWAT simulated water balance for the M2 setup in the Melk catchment. .

| Year | PREC<br>(mm) | ET<br>(mm) | SW<br>(mm) | PERC<br>(mm) | SURQ<br>(mm) | GWQ<br>(mm) | WYIELD<br>(mm) | LATQ<br>(mm) | $\Delta$ S<br>(mm) | Balance<br>(mm) | Percentage<br>error (%) |
|------|--------------|------------|------------|--------------|--------------|-------------|----------------|--------------|--------------------|-----------------|-------------------------|
| 1985 | 913          | 527        | 273        | 91           | 85           | 4           | 303            | 203          | -0.1               | -4              | -0.4                    |
| 1986 | 726          | 459        | 287        | 42           | 98           | 15          | 237            | 116          | -13.9              | 17              | 2.3                     |
| 1987 | 952          | 526        | 273        | 92           | 148          | 10          | 383            | 205          | 0.3                | -40             | -4.2                    |
| 1988 | 982          | 508        | 274        | 130          | 78           | 22          | 381            | 262          | -1.1               | -13             | -1.3                    |
| 1989 | 979          | 578        | 274        | 107          | 50           | 24          | 346            | 249          | -0.6               | -27             | -2.7                    |
| 1990 | 781          | 508        | 291        | 62           | 21           | 8           | 209            | 168          | -17.9              | 27              | 3.5                     |
| 1991 | 897          | 509        | 284        | 89           | 102          | 8           | 327            | 201          | -11.3              | -9              | -1.0                    |
| 1992 | 782          | 486        | 271        | 85           | 21           | 15          | 262            | 210          | 2.3                | -38             | -4.9                    |
| 1993 | 842          | 516        | 273        | 75           | 55           | 14          | 265            | 182          | 0.3                | 0               | 0.0                     |
| 1994 | 806          | 508        | 266        | 85           | 28           | 16          | 257            | 196          | 6.5                | -35             | -4.4                    |
| 1995 | 932          | 529        | 273        | 107          | 41           | 16          | 317            | 242          | -0.4               | -5              | -0.5                    |
| 1996 | 997          | 517        | 275        | 124          | 102          | 26          | 408            | 258          | -2.5               | -23             | -2.4                    |
| 1997 | 926          | 544        | 273        | 107          | 40           | 16          | 319            | 241          | -0.3               | -29             | -3.1                    |
| 1998 | 926          | 540        | 292        | 90           | 54           | 21          | 313            | 221          | -19.1              | 22              | 2.4                     |
| 1999 | 948          | 533        | 291        | 88           | 125          | 13          | 354            | 199          | -18.1              | 4               | 0.4                     |
| 2000 | 745          | 485        | 257        | 66           | 46           | 13          | 237            | 160          | 16.1               | -45             | -6.1                    |
| 2001 | 879          | 512        | 295        | 79           | 76           | 9           | 288            | 197          | -22.0              | 32              | 3.6                     |
| 2002 | 1040         | 520        | 293        | 134          | 118          | 33          | 444            | 271          | -19.7              | -6              | -0.6                    |
| 2003 | 608          | 461        | 258        | 37           | 43           | 14          | 180            | 105          | 15.2               | -72             | -11.8                   |
| 2004 | 779          | 500        | 261        | 55           | 75           | 4           | 234            | 144          | 11.7               | -19             | -2.4                    |
| 2005 | 981          | 531        | 274        | 104          | 96           | 6           | 345            | 227          | -1.0               | 9               | 0.9                     |
| 2006 | 926          | 524        | 270        | 85           | 134          | 5           | 353            | 197          | 2.7                | -34             | -3.7                    |
| 2007 | 1008         | 515        | 275        | 143          | 51           | 36          | 392            | 287          | -2.5               | -4              | -0.4                    |
| 2008 | 829          | 541        | 273        | 81           | 20           | 18          | 254            | 195          | -0.2               | -28             | -3.4                    |
| 2009 | 1131         | 545        | 281        | 155          | 115          | 27          | 480            | 309          | -8.3               | -13             | -1.2                    |
| 2010 | 864          | 528        | 280        | 75           | 66           | 4           | 266            | 178          | -7.1               | 6               | 0.7                     |
| 2011 | 676          | 513        | 259        | 37           | 43           | 2           | 172            | 120          | 13.6               | -58             | -8.5                    |
| 2012 | 762          | 522        | 263        | 54           | 32           | 10          | 200            | 150          | 9.9                | -15             | -2.0                    |
| 2013 | 991          | 524        | 268        | 128          | 68           | 23          | 382            | 270          | 4.6                | -24             | -2.4                    |
| 2014 | 862          | 534        | 270        | 78           | 50           | 8           | 268            | 194          | 3.2                | -12             | -1.4                    |
| 2015 | 627          | 480        | 247        | 40           | 16           | 8           | 153            | 118          | 25.9               | -65             | -10.3                   |

Abbreviations: PREC: precipitation; ET: evapotranspiration; SW: soil water content; PERC: water entering the vadose zone from the soil profile; SURQ: surface runoff; GWQ:

groundwater contribution to streamflow; WYIELD: water yield; LATQ: lateral flow;  $\Delta$ SW: the change of soil water content.

**Table S8.** SWAT simulated water balance for the Zaya catchment.

| Year | PREC<br>(mm) | ET<br>(mm) | SW<br>(mm) | PERC<br>(mm) | SURQ<br>(mm) | GWQ<br>(mm) | WYIELD<br>(mm) | LATQ<br>(mm) | $\Delta$ S<br>(mm) | Balance<br>(mm) | Percentage<br>error (%) |
|------|--------------|------------|------------|--------------|--------------|-------------|----------------|--------------|--------------------|-----------------|-------------------------|
| 1985 | 664          | 543        | 237        | 26           | 9            | 0           | 44             | 29           | -50.6              | 102.1           | 15.4                    |
| 1986 | 504          | 514        | 177        | 24           | 7            | 0           | 45             | 23           | 8.8                | -88.4           | -17.6                   |
| 1987 | 693          | 569        | 228        | 40           | 10           | 0           | 59             | 33           | -41.6              | 67.1            | 9.7                     |
| 1988 | 484          | 461        | 189        | 33           | 4            | 0           | 42             | 23           | -2.4               | -49.4           | -10.2                   |
| 1989 | 463          | 501        | 133        | 3            | 2            | 0           | 22             | 16           | 53.2               | -115.8          | -25.0                   |
| 1990 | 448          | 395        | 153        | 1            | 2            | 0           | 17             | 14           | 32.8               | 1.8             | 0.4                     |
| 1991 | 469          | 431        | 169        | 3            | 6            | 0           | 23             | 17           | 17.5               | -6.4            | -1.4                    |
| 1992 | 444          | 418        | 165        | 10           | 3            | 0           | 29             | 22           | 21.6               | -34.6           | -7.8                    |
| 1993 | 538          | 492        | 173        | 4            | 3            | 0           | 23             | 19           | 12.9               | 6.2             | 1.2                     |
| 1994 | 495          | 506        | 141        | 7            | 3            | 0           | 26             | 20           | 45.4               | -90.9           | -18.4                   |
| 1995 | 696          | 529        | 224        | 16           | 10           | 0           | 46             | 32           | -38.2              | 143.8           | 20.7                    |
| 1996 | 669          | 563        | 221        | 65           | 18           | 0           | 86             | 40           | -34.3              | -9.9            | -1.5                    |
| 1997 | 631          | 544        | 246        | 34           | 15           | 0           | 62             | 34           | -59.5              | 50.1            | 8.0                     |
| 1998 | 558          | 527        | 235        | 10           | 3            | 0           | 35             | 25           | -48.8              | 35.3            | 6.3                     |
| 1999 | 548          | 533        | 196        | 24           | 6            | 0           | 40             | 23           | -9.9               | -38.9           | -7.1                    |
| 2000 | 495          | 484        | 175        | 8            | 4            | 0           | 26             | 18           | 11.4               | -34.4           | -7.0                    |
| 2001 | 540          | 508        | 170        | 4            | 4            | 0           | 25             | 19           | 16.3               | -13.6           | -2.5                    |
| 2002 | 705          | 564        | 245        | 25           | 5            | 0           | 49             | 39           | -58.6              | 125.6           | 17.8                    |
| 2003 | 386          | 442        | 166        | 17           | 6            | 0           | 32             | 14           | 19.9               | -124.3          | -32.2                   |
| 2004 | 530          | 484        | 163        | 21           | 7            | 0           | 41             | 24           | 23.2               | -38.7           | -7.3                    |
| 2005 | 571          | 523        | 155        | 2            | 9            | 0           | 25             | 16           | 30.8               | -9.3            | -1.6                    |
| 2006 | 617          | 568        | 156        | 33           | 9            | 0           | 56             | 33           | 30.2               | -70.5           | -11.4                   |
| 2007 | 585          | 467        | 224        | 14           | 4            | 0           | 38             | 30           | -37.9              | 103.9           | 17.8                    |
| 2008 | 485          | 533        | 153        | 6            | 3            | 0           | 27             | 18           | 33.0               | -114.0          | -23.5                   |
| 2009 | 670          | 528        | 203        | 41           | 8            | 0           | 63             | 39           | -17.0              | 54.2            | 8.1                     |
| 2010 | 780          | 617        | 235        | 56           | 11           | 0           | 76             | 44           | -48.6              | 81.0            | 10.4                    |
| 2011 | 469          | 532        | 141        | 27           | 8            | 0           | 45             | 21           | 45.7               | -181.3          | -38.7                   |
| 2012 | 464          | 445        | 130        | 0            | 2            | 0           | 16             | 13           | 56.0               | -51.9           | -11.2                   |
| 2013 | 629          | 550        | 169        | 17           | 7            | 0           | 44             | 30           | 17.1               | -0.1            | 0.0                     |
| 2014 | 683          | 528        | 252        | 26           | 6            | 0           | 49             | 38           | -65.6              | 146.1           | 21.4                    |
| 2015 | 430          | 465        | 176        | 18           | 4            | 0           | 39             | 20           | 9.9                | -102.3          | -23.8                   |

Abbreviations: PREC: precipitation; ET: evapotranspiration; SW: soil water content; PERC: water entering the vadose zone from the soil profile; SURQ: surface runoff; GWQ: groundwater contribution to streamflow; WYIELD: water yield; LATQ: lateral flow;  $\Delta$ SW: the change of soil water content.

## 8. ANOVA Analysis

**Table S9.** ANOVA analysis for identifying the impact of daily precipitation on daily N<sub>2</sub>O emissions from spring barley.

| Year | Df | Sum Sq   | Mean Sq  | F value | Pr(>F)     |
|------|----|----------|----------|---------|------------|
| 2006 | 1  | 0.08     | 0.08007  | 4.467   | 0.0352*    |
| 2007 | 1  | 0.000042 | 4.24E-02 | 3.511   | 0.0618     |
| 2008 | 1  | 2.8E-06  | 2.84E-03 | 0.394   | 0.53       |
| 2009 | 1  | 0.000057 | 5.71E-02 | 3.883   | 0.0495*    |
| 2010 | 1  | 0.000116 | 1.16E-01 | 5.087   | 0.0247*    |
| 2011 | 1  | 0.000204 | 2.04E-01 | 3.256   | 0.072      |
| 2012 | 1  | 0.000011 | 1.06E-02 | 0.289   | 0.591      |
| 2013 | 1  | 0.000117 | 1.17E-01 | 8.893   | 0.00306 ** |
| 2014 | 1  | 0        | 5.00E-05 | 0.001   | 0.976      |
| 2015 | 1  | 0.00006  | 6.38E-02 | 0.6     | 0.439      |

Df: the degrees of freedom for the independent variable, and the degrees of freedom for the residuals. Sum Sq: the sum of squares. Mean Sq: the mean of the sum of squares. F value: the test statistic from the F test. Pr(>F): the p-value of the F-statistic. Significant codes: 0 '\*\*\*\*', 0.001 '\*\*\*', 0.01 '\*\*', 0.05 '.'. The absolute percentage errors of simulated water balance for the years 2006, 2009, 2010 and 2013 were <11%.

## References

- Neitsch, S. L., Arnold, J. G., Kiniry, J. R., & Williams, J. R. Soil and water assessment tool theoretical documentation version 2009. Texas Water Resources Institute. <https://swat.tamu.edu/media/99192/swat2009-theory.pdf>
- Parton, W. J., Mosier, A. R., Ojima, D. S., Valentine, D. W., Schimel, D. S., Weier, K., & Kulmala, A. E. (1996). Generalized model for N<sub>2</sub> and N<sub>2</sub>O production from nitrification and denitrification. *Global biogeochemical cycles*, 10(3), 401-412. <https://doi.org/10.1029/96GB01455>
- Wagena, M. B., Bock, E. M., Sommerlot, A. R., Fuka, D. R., & Easton, Z. M. (2017). Development of a nitrous oxide routine for the SWAT model to assess greenhouse gas emissions from agroecosystems. *Environmental modelling & software*, 89, 131-143. <https://doi.org/10.1016/j.envsoft.2016.11.013>
- Yoshida, T., & Alexander, M. Nitrous oxide formation by *Nitrosomonas europaea* and heterotrophic microorganisms. *Soil Science Society of America Journal* 1970, 34(6), 880-882. <https://doi.org/10.2136/sssaj1970.03615995003400060020x>
- Bremner, J. M. Sources of nitrous oxide in soils. *Nutrient cycling in Agroecosystems* 1997, 49, 7-16. <https://doi.org/10.1023/A:1009798022569>
- Freney, J. R., Denmead, O. T., & Simpson, J. R. Nitrous oxide emission from soils at low moisture contents. *Soil Biol. Biochem.*; (United Kingdom) 1979, 11(2). [https://doi.org/10.1016/0038-0717\(79\)90096-8](https://doi.org/10.1016/0038-0717(79)90096-8)
- Goreau, T. J., Kaplan, W. A., Wofsy, S. C., McElroy, M. B., Valois, F. W., & Watson, S. W. Production of NO<sub>2</sub>- and N<sub>2</sub>O by nitrifying bacteria at reduced concentrations of oxygen. *Applied and environmental microbiology* 1980, 40(3), 526-532. <https://doi.org/10.1128/aem.40.3.526-532.1980>
- Lipschultz, F., Zafiriou, O. C., Wofsy, S. C., McElroy, M. B., Valois, F. W., & Watson, S. W. Production of NO and N<sub>2</sub>O by soil nitrifying bacteria. *Nature* 1981, 294(5842), 641-643. <https://www.nature.com/articles/294641a0>
- Goodroad, L. L., & Keeney, D. R. Nitrous oxide production in aerobic soils under varying pH, temperature and water content. *Soil Biology and Biochemistry* 1984, 16(1), 39-43. [https://doi.org/10.1016/0038-0717\(84\)90123-8](https://doi.org/10.1016/0038-0717(84)90123-8)
- Hynes, R. K., & Knowles, R. Production of nitrous oxide by *Nitrosomonas europaea*: effects of acetylene, pH, and oxygen. *Canadian Journal of Microbiology* 1984, 30(11), 1397-1404. <https://doi.org/10.1139/m84-222>
- Martikainen, P. J. Nitrous oxide emission associated with autotrophic ammonium oxidation in acid coniferous forest soil. *Applied and Environmental Microbiology* 1985, 50(6), 1519-1525. <https://doi.org/10.1128/aem.50.6.1519-1525.1985>
- Tortoso, A. C., & Hutchinson, G. L. Contributions of autotrophic and heterotrophic nitrifiers to soil NO and N<sub>2</sub>O emissions. *Applied and Environmental Microbiology* 1990, 56(6), 1799-1805. <https://doi.org/10.1128/aem.56.6.1799-1805.1990>
- Remde, A., & Conrad, R. Production of nitric oxide in *Nitrosomonas europaea* by reduction of nitrite. *Archives of Microbiology* 1990, 154(2), 187-191. <https://link.springer.com/article/10.1007/BF00423331>
- Martikainen, P. J., & de Boer, W. Nitrous oxide production and nitrification in acidic soil from a Dutch coniferous forest. *Soil Biology and Biochemistry* 1993, 25(3), 343-347. [https://doi.org/10.1016/0038-0717\(93\)90133-V](https://doi.org/10.1016/0038-0717(93)90133-V)
- Maag, M., & Vinther, F. P. Nitrous oxide emission by nitrification and denitrification in different soil types and at different soil

- moisture contents and temperatures. *Applied Soil Ecology* **1996**, *4*, 5–14. [https://doi.org/10.1016/0929-1393\(96\)00106-0](https://doi.org/10.1016/0929-1393(96)00106-0)
16. Kester, R., DeBoer, W., & Laanbroek, H. J. Production of NO and N<sub>2</sub>O by Pure Cultures of Nitrifying and Denitrifying Bacteria During Changes in Aeration. *Appl. Environ. Microbiol* **1997**, *63*, 3872–3877
  17. Jiang, Q. Q., & Bakken, L. R. Nitrous oxide production and methane oxidation by different ammonia-oxidizing bacteria. *Applied and Environmental Microbiology* **1999**, *65*(6), 2679–2684. <https://doi.org/10.1128/AEM.65.6.2679-2684.1999>
  18. Ingwersen, J., Butterbach-Bahl, K., Gasche, R., Richter, O., & Papen, H. Barometric process separation: new method for quantifying nitrification, denitrification, and nitrous oxide sources in soils. *Soil Science Society of America Journal* **1999**, *63*(1), 117–128. <https://doi.org/10.2136/sssaj1999.03615995006300010018x>
  19. Garrido, F., Hénault, C., Gaillard, H., Pérez, S., & Germon, J. C. N<sub>2</sub>O and NO emissions by agricultural soils with low hydraulic potentials. *Soil Biology and Biochemistry* **2002**, *34*(5), 559–575. [https://doi.org/10.1016/s0038-0717\(01\)00172-9](https://doi.org/10.1016/s0038-0717(01)00172-9)
  20. Khalil, K., Mary, B., & Renault, P. Nitrous oxide production by nitrification and denitrification in soil aggregates as affected by O<sub>2</sub> concentration. *Soil Biology and Biochemistry* **2004**, *36*(4), 687–699. <https://doi.org/10.1016/j.soilbio.2004.01.004>
  21. Cheng, W., Tsuruta, H., Chen, G., & Yagi, K. N<sub>2</sub>O and NO production in various Chinese agricultural soils by nitrification. *Soil Biology and Biochemistry* **2004**, *36*(6), 953–963. <https://doi.org/10.1016/j.soilbio.2004.02.012>
  22. Bateman, E. J., Baggs, E. M. Contributions of nitrification and denitrification to N<sub>2</sub>O emissions from soils at different water-filled pore space. *Biology and fertility of soils* **2005**, *41*, 379–388. <https://doi.org/10.1007/s00374-005-0858-3>
  23. Mathieu, O., Hénault, C., Lévêque, J., Baujard, E., Milloux, M. J., & Andreux, F. Quantifying the contribution of nitrification and denitrification to the nitrous oxide flux using 15N tracers. *Environmental Pollution* **2006**, *144*(3), 933–940. <https://doi.org/10.1016/j.envpol.2006.02.005>
  24. Mørkved, P. T., Dörsch, P., Henriksen, T. M., & Bakken, L. R. N<sub>2</sub>O emissions and product ratios of nitrification and denitrification as affected by freezing and thawing. *Soil Biology and Biochemistry* **2006**, *38*(12), 3411–3420. <https://doi.org/10.1016/j.soilbio.2006.05.015>
  25. Mørkved, P. T., Dörsch, P., & Bakken, L. R. The N<sub>2</sub>O product ratio of nitrification and its dependence on long-term changes in soil pH. *Soil Biology and Biochemistry* **2007**, *39*(8), 2048–2057. <https://doi.org/10.1016/j.soilbio.2007.03.006>
  26. Carter, M. S. Contribution of nitrification and denitrification to N<sub>2</sub>O emissions from urine patches. *Soil Biology and Biochemistry* **2007**, *39*(8), 2091–2102. <https://doi.org/10.1016/j.soilbio.2007.03.013>
  27. Chen, D., Suter, H. C., Islam, A., & Edis, R. Influence of nitrification inhibitors on nitrification and nitrous oxide (N<sub>2</sub>O) emission from a clay loam soil fertilized with urea. *Soil Biology and Biochemistry* **2010**, *42*(4), 660–664. <https://doi.org/10.1016/j.soilbio.2009.12.014>
  28. Galbally, I. E., Meyer, M. C., Wang, Y. P., Smith, C. J., & Weeks, I. A. Nitrous oxide emissions from a legume pasture and the influences of liming and urine addition. *Agriculture, Ecosystems & Environment* **2010**, *136*(3–4), 262–272. <https://doi.org/10.1016/j.agee.2009.10.013>
  29. Frame, C. H., & Casciotti, K. L. Biogeochemical controls and isotopic signatures of nitrous oxide production by a marine ammonia-oxidizing bacterium **2010**. <https://doi.org/10.5194/bg-7-2695-2010>
  30. Zhu, X., Silva, L. C., Doane, T. A., & Horwath, W. R. Iron: the forgotten driver of nitrous oxide production in agricultural soil. *PloS one* **2013**, *8*(3), e60146. <https://doi.org/10.1371/journal.pone.0060146>
  31. Paul, J. W., Beauchamp, E. G., & Zhang, X. Nitrous and nitric oxide emissions during nitrification and denitrification from manure-amended soil in the laboratory. *Canadian Journal of Soil Science* **1993**, *73*(4), 539–553. <https://doi.org/10.4141/cjss93-054>
